# Supplementary material for: The progression pattern of male hyrax songs and the role of climactic ending
Source: PubMed Central journal article supplement (PMC5459900; doi:10.1038/s41598-017-03035-x), 2017-06-05
Supplement: 41598_2017_3035_MOESM1_ESM.pdf [file 41598_2017_3035_MOESM1_ESM.pdf]

## The progression pattern of male hyrax songs and the role of climactic ending

Vlad Demartsev<sup>1,2,\*</sup>, Amiyaal Ilany<sup>3</sup>, Arik Kershenbaum<sup>4</sup>, Yair Geva<sup>1</sup>, Ori Margalit<sup>1</sup>, Inbar Schnitzer<sup>3</sup>, Adi Barocas<sup>5</sup>, Einat Bar-Ziv<sup>6</sup>, Lee Koren<sup>3</sup>  
and Eli Geffen<sup>1</sup>

<sup>1</sup>*Dept. of Zoology, Tel Aviv University, Tel Aviv 69978, Israel.*

<sup>2</sup>*Dept. of Evolutionary Biology and Environmental Studies, University of Zurich, Zurich 8057, Switzerland*

<sup>3</sup>*The Mina and Everard Goodman Faculty of Life Sciences, Bar-Ilan University, Ramat-Gan, 52900 Israel.*

<sup>4</sup>*Dept. of Zoology, University of Cambridge, Cambridge, UK*

<sup>5</sup>*Dept. of Zoology and Physiology and Program in Ecology, University of Wyoming, Laramie, WY 82071, USA.*

<sup>6</sup>*Mitrani Dept. of Desert Ecology, Ben-Gurion University of the Negev, 8499000 Israel*

**\*Corresponding author:** Vlad Demartsev *Dept. of Zoology, Tel Aviv University, Tel Aviv 69978, Israel. Dept. of Evolutionary Biology and Environmental Studies, University of Zurich, Zurich 8057, Switzerland* E-Mail: [demartsev@gmail.com](mailto:demartsev@gmail.com) Tel.+41766516340

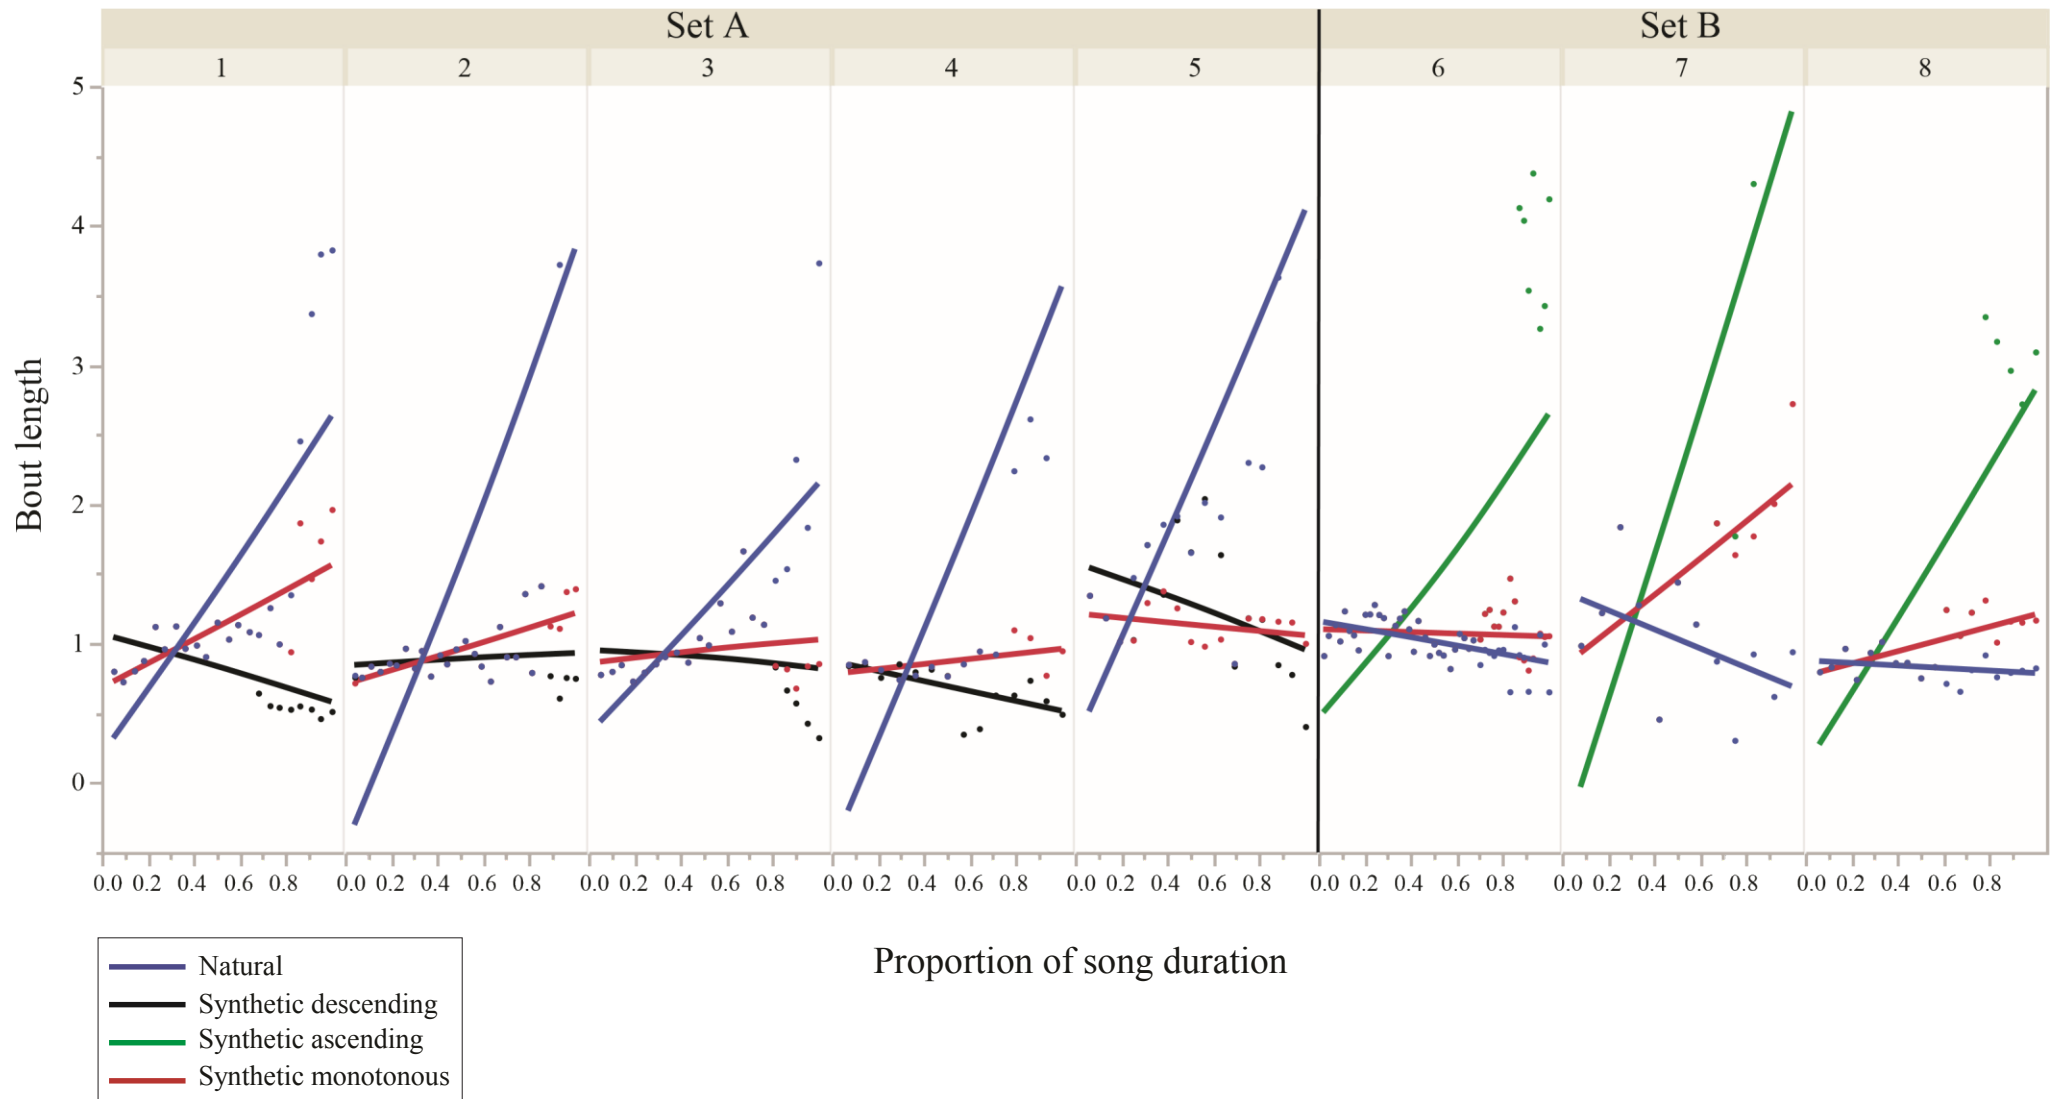

Fig S1: Progression of bout duration (sec) through the proportion of song length for tracks used in playback trials. SetA: Tracks used in trials in which Natural ascending songs (N1-5) were manipulated to have monotonous (MON1-5) or descending (DSC1-5) bout duration. SetB: Tracks used in trials in which Natural descending songs (N6-8) were manipulated to have monotonous (MON6-8) or ascending (ASC6-8) bout duration

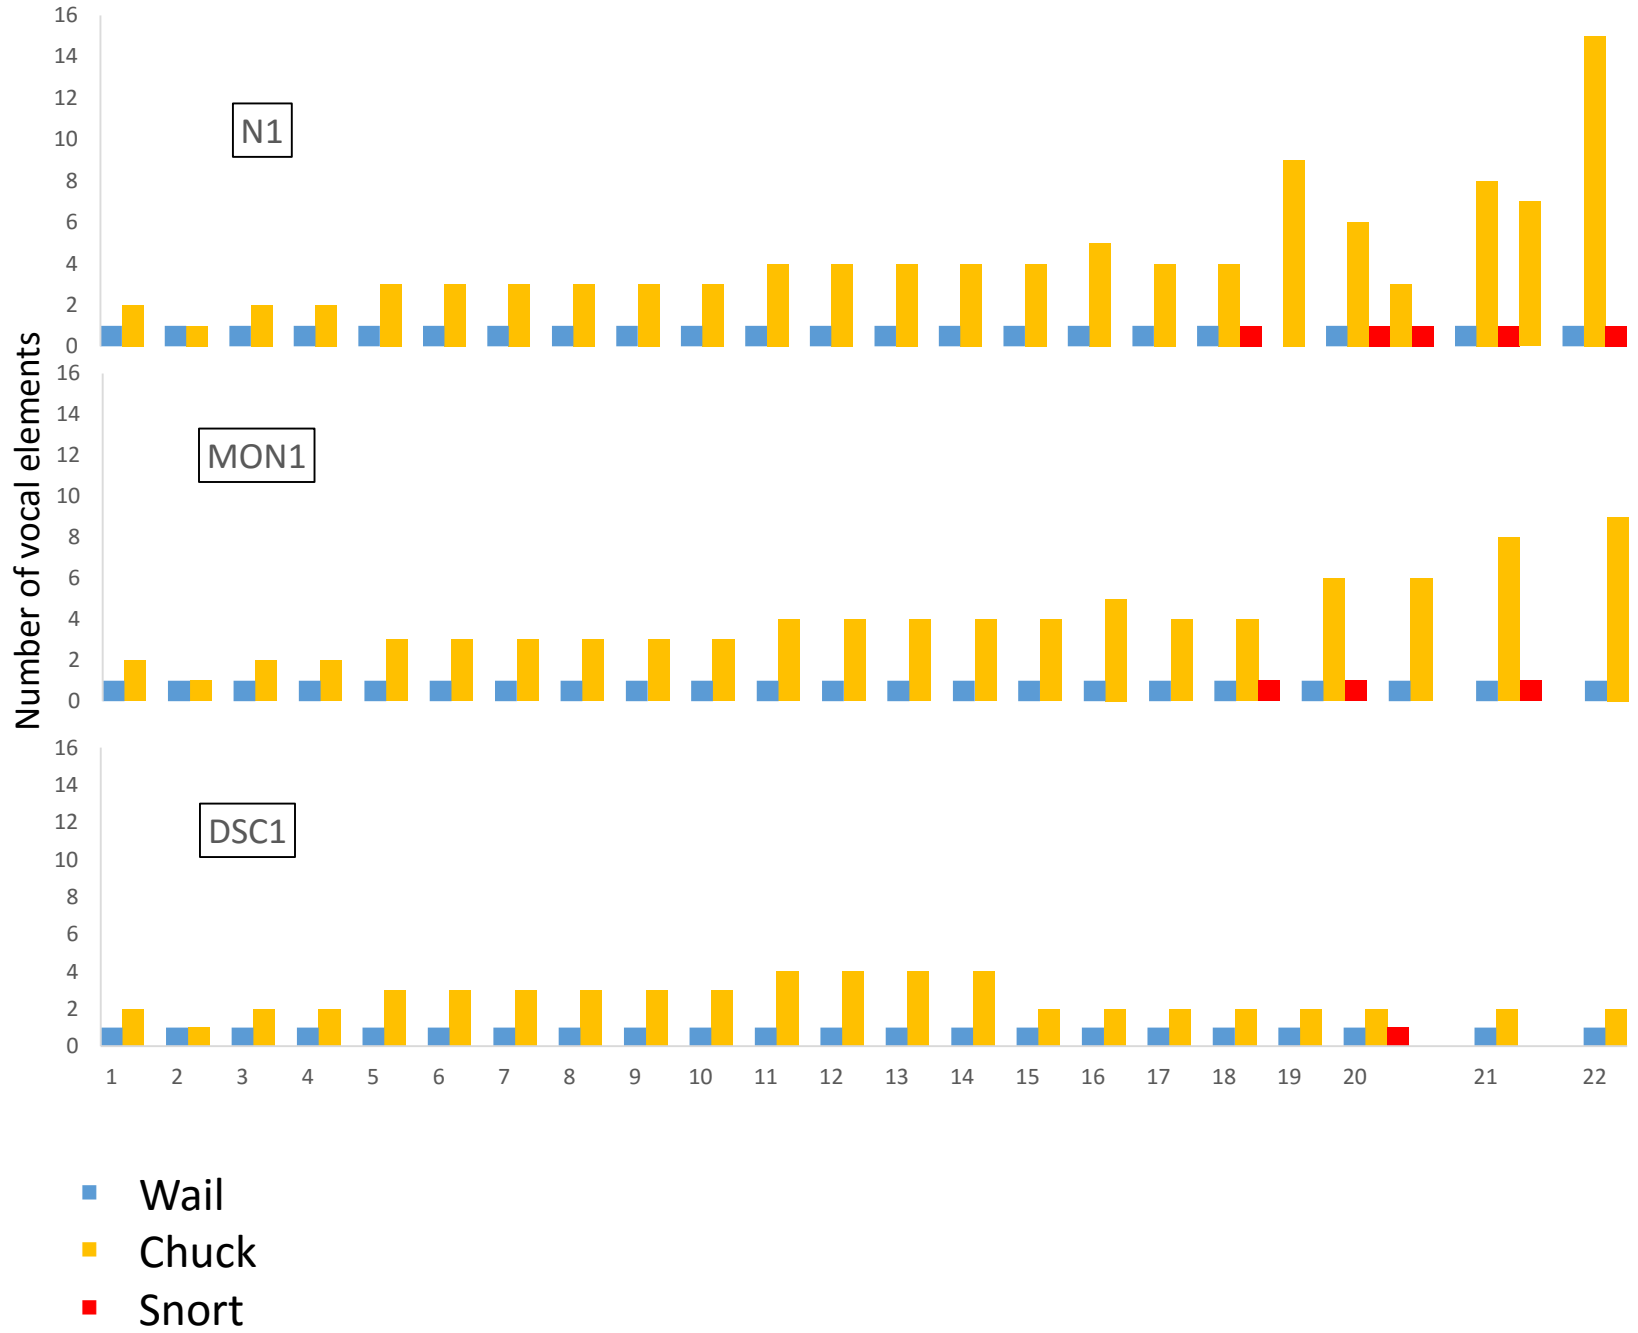

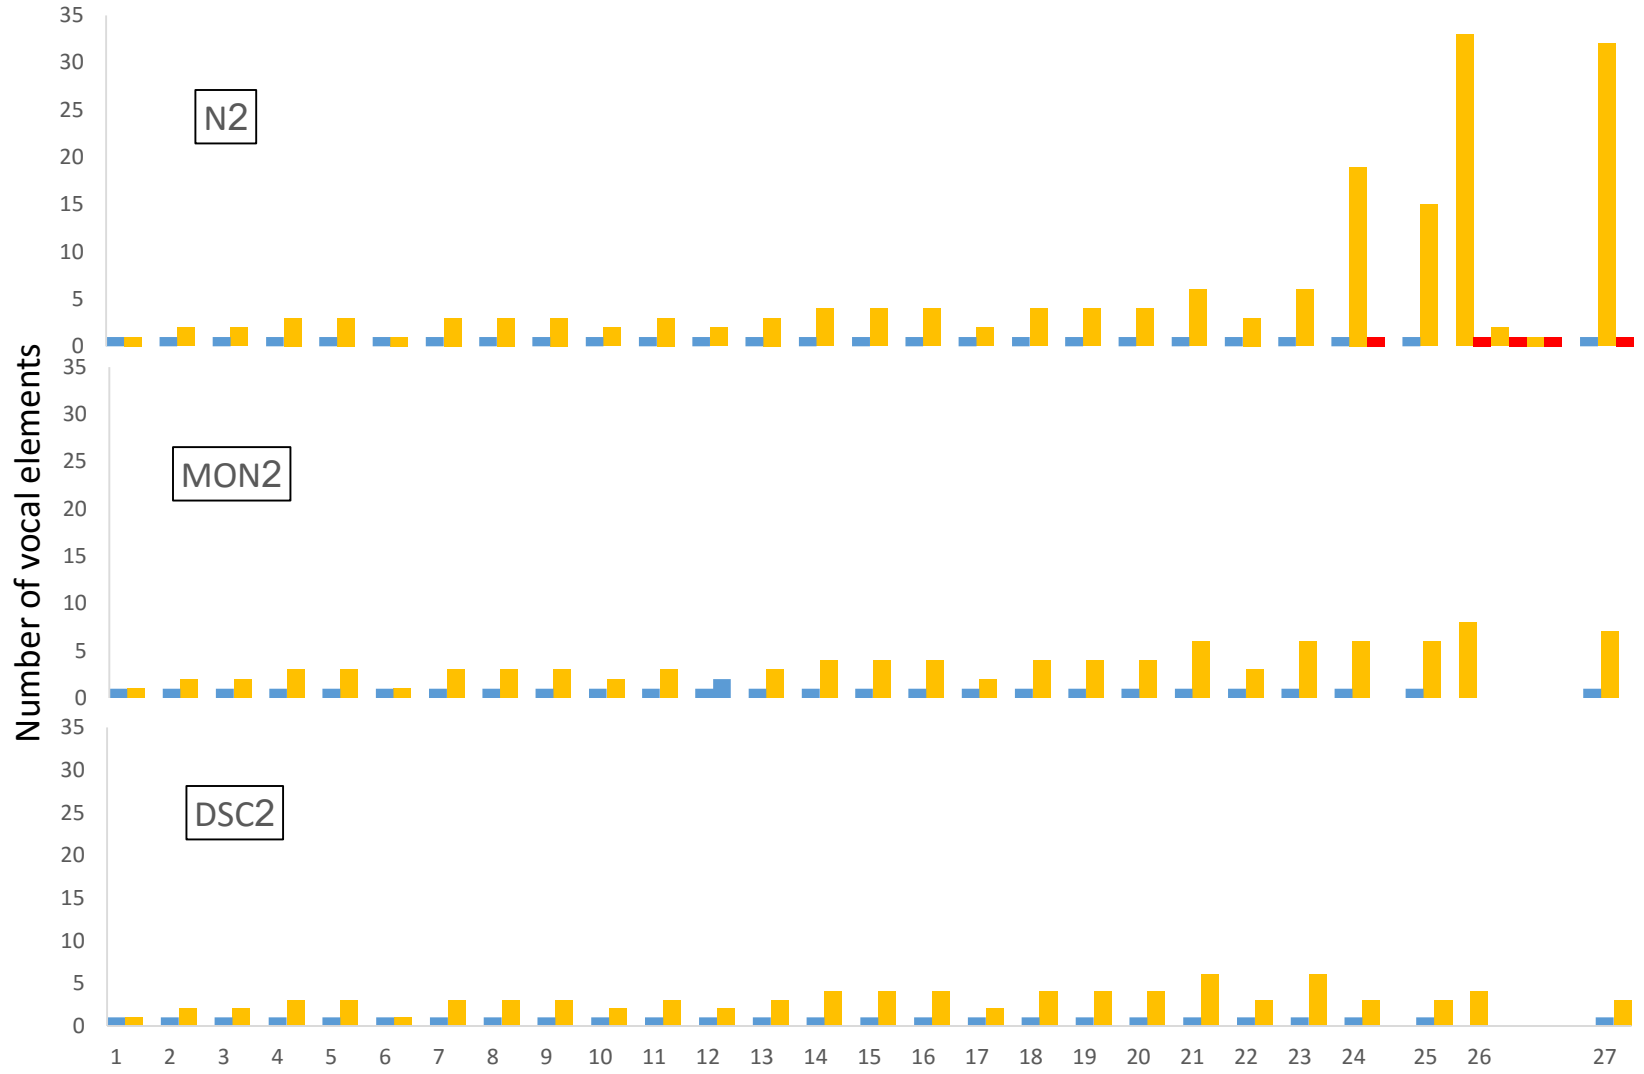

- Wail
- Chuck
- Snort

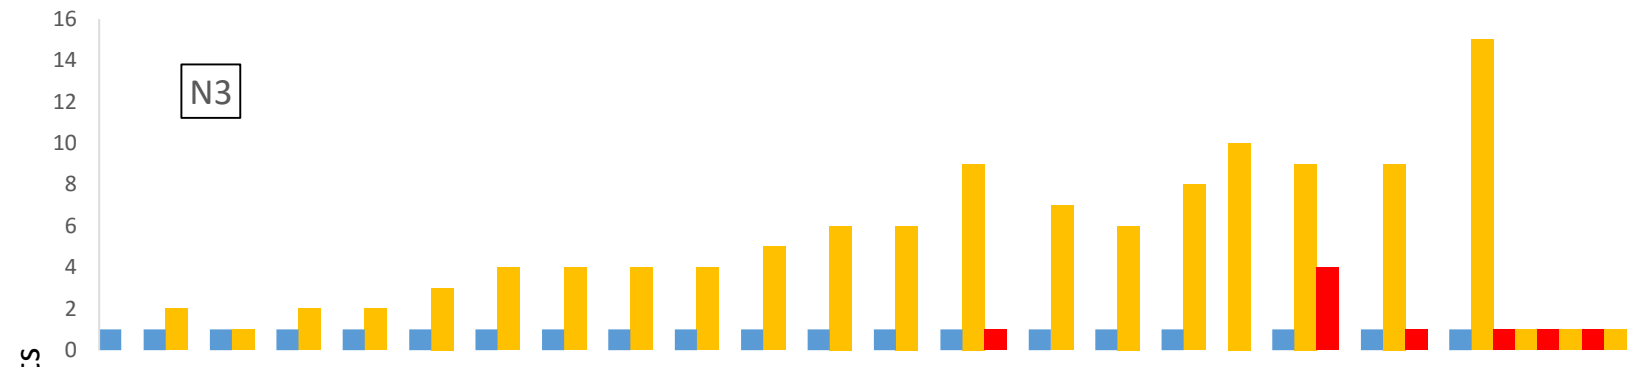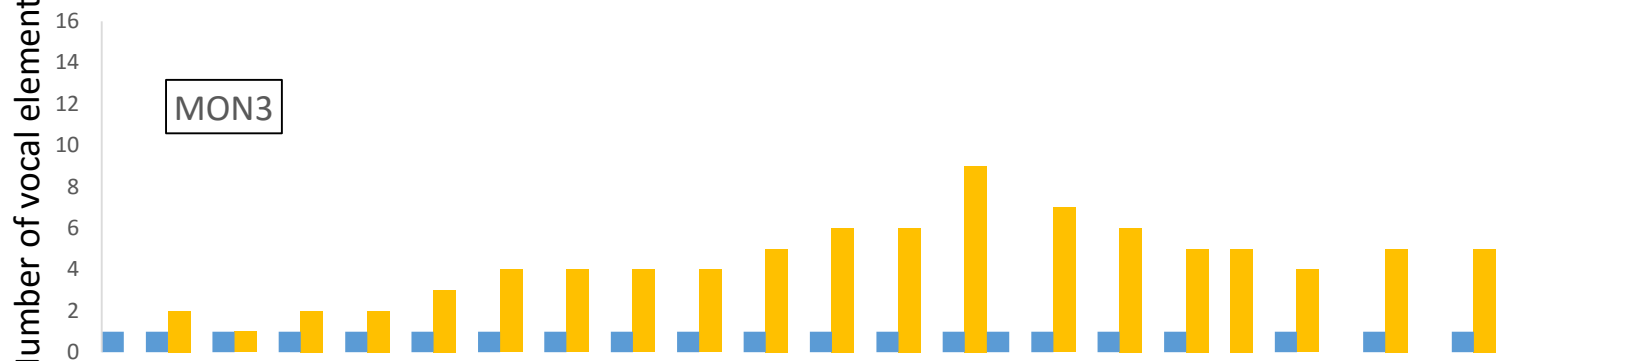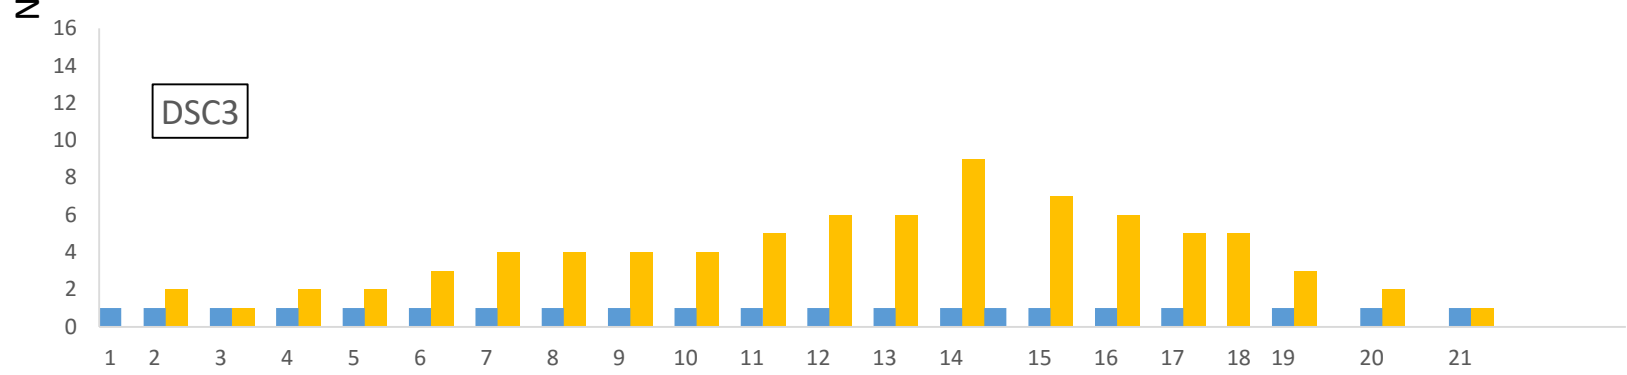

- Wail
- Chuck
- Snort

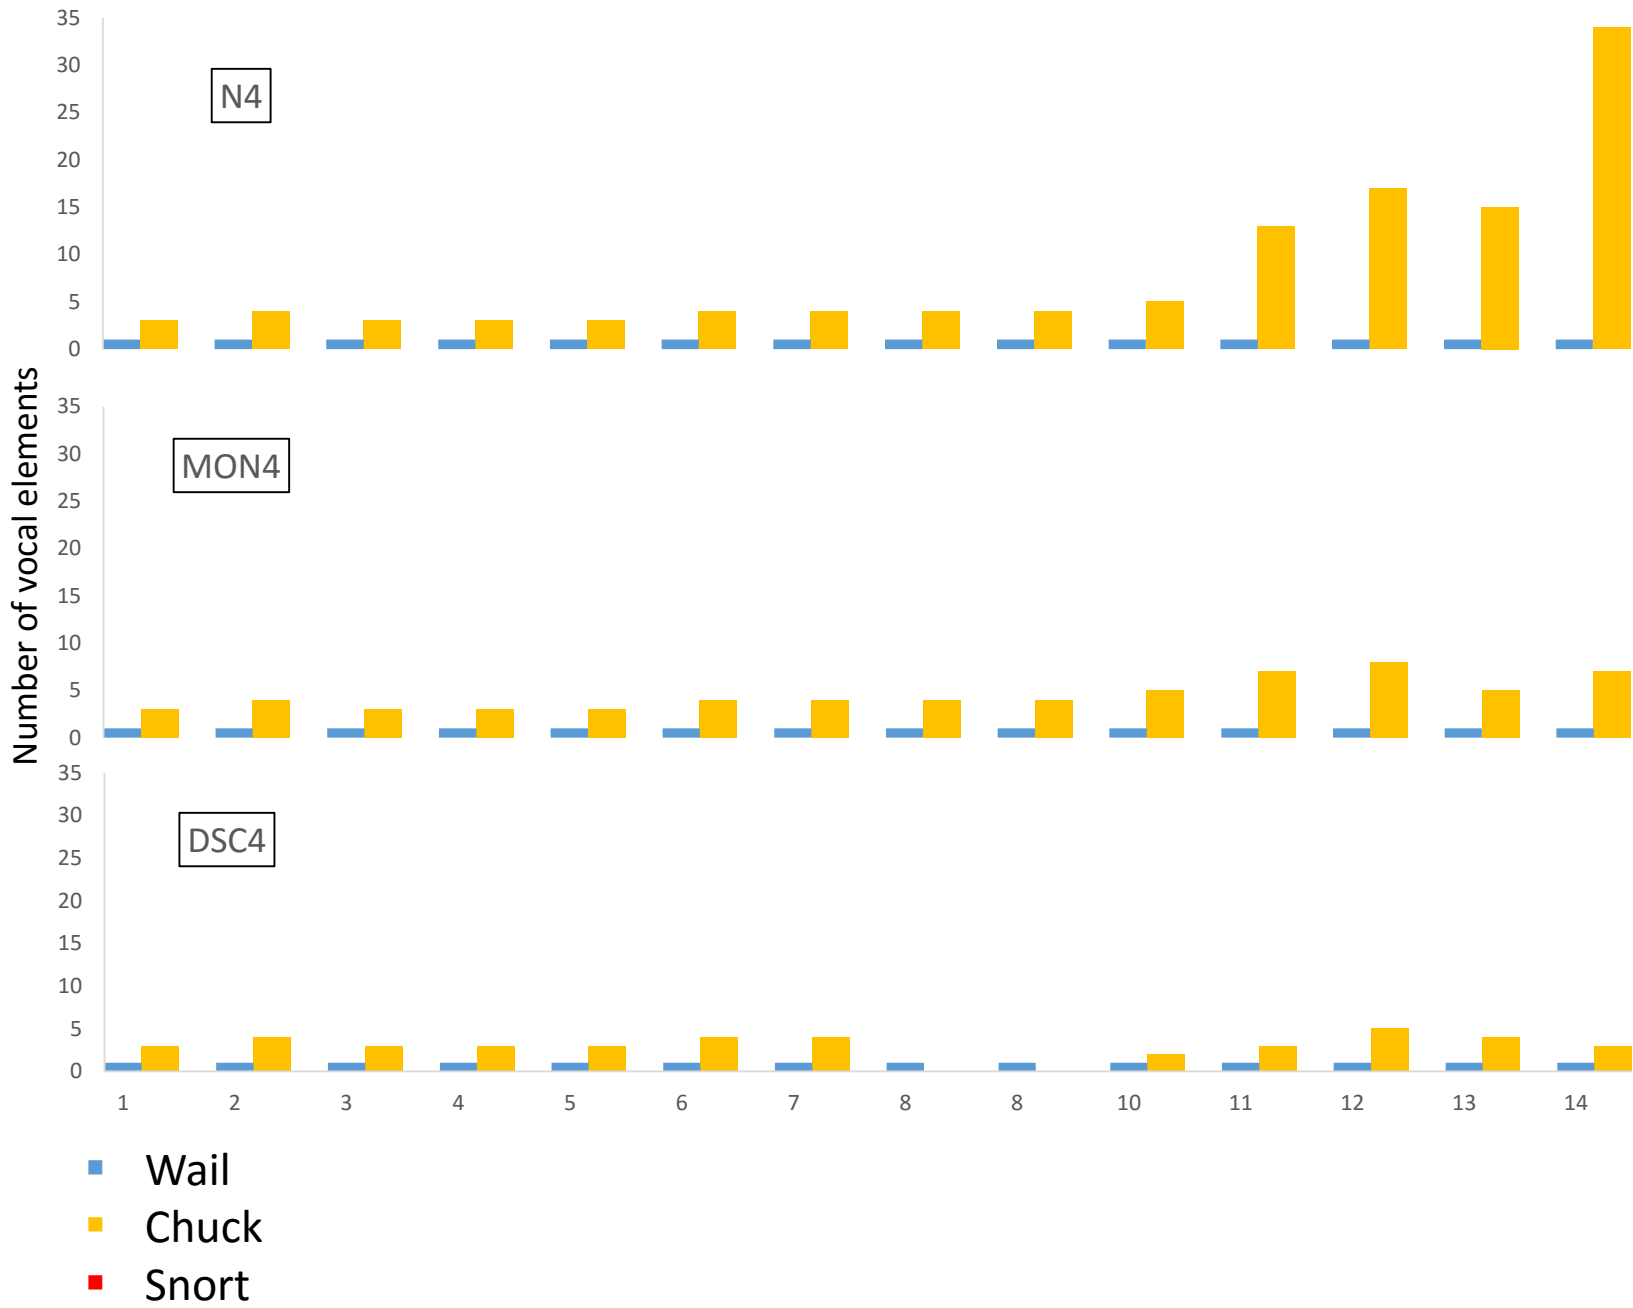

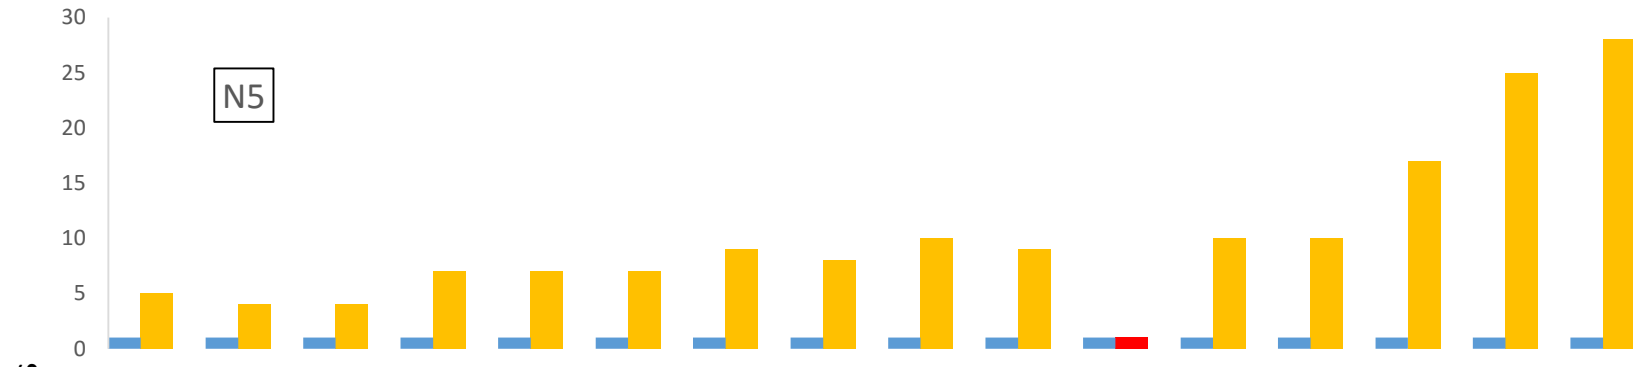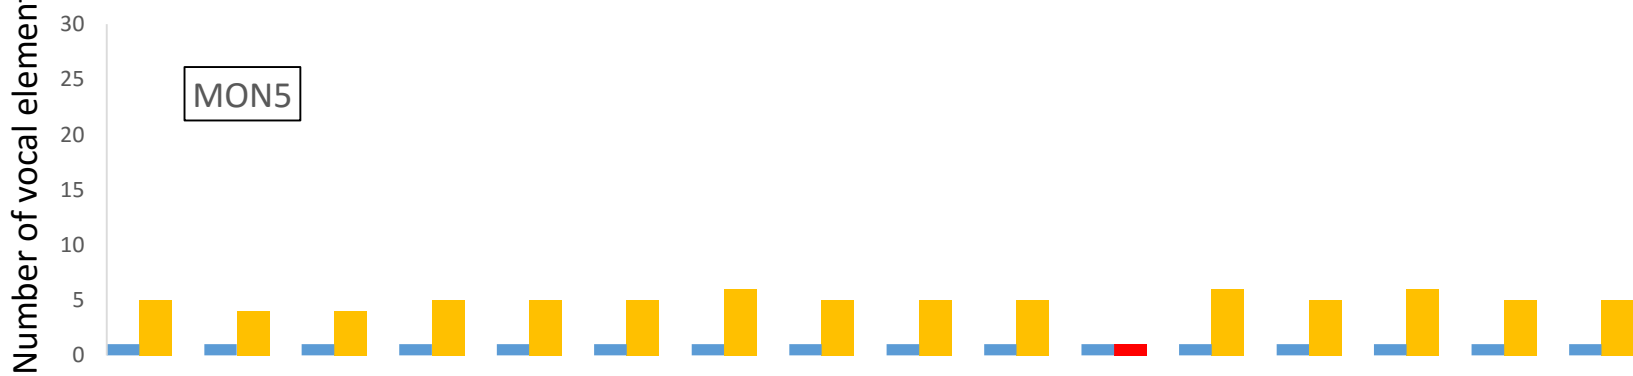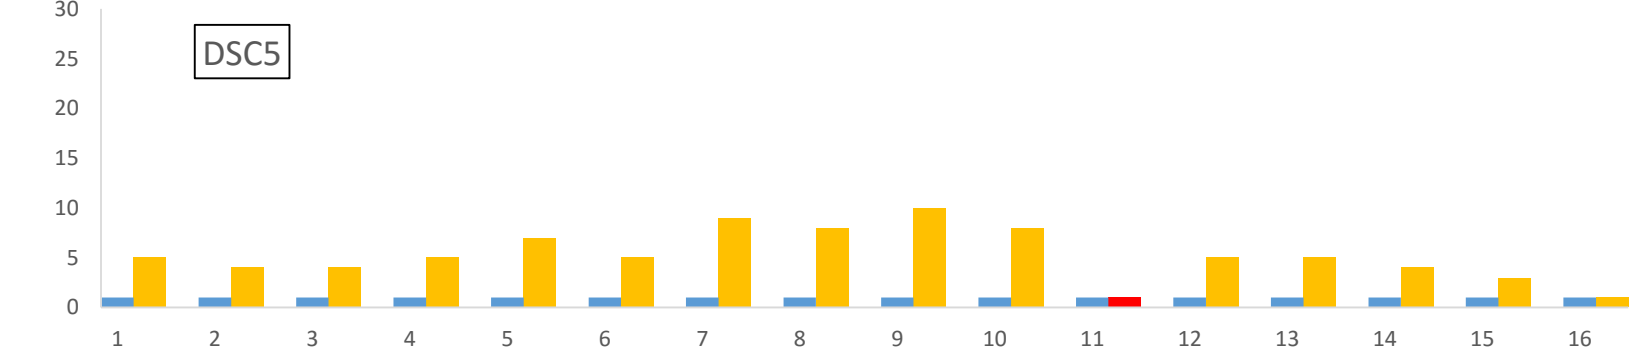

- Wail
- Chuck
- Snort

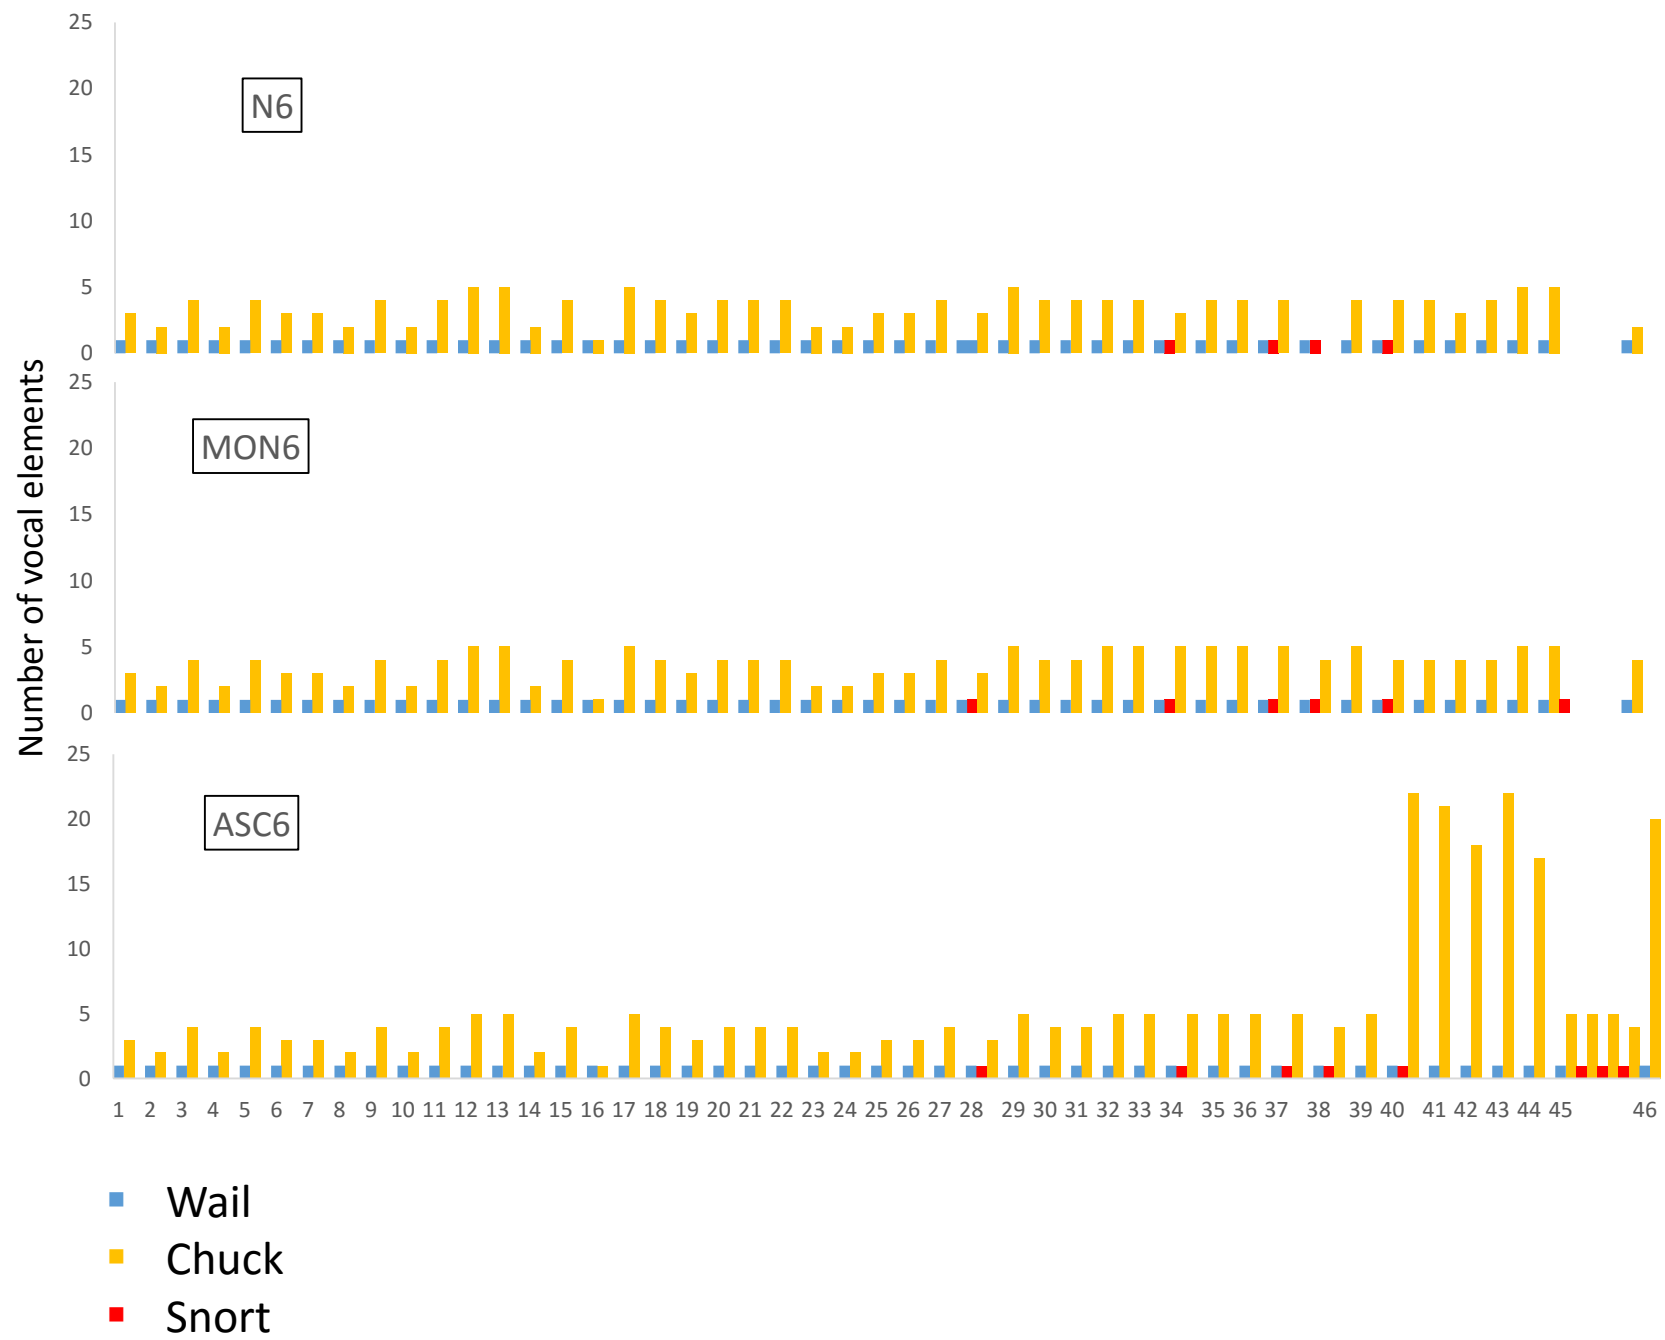



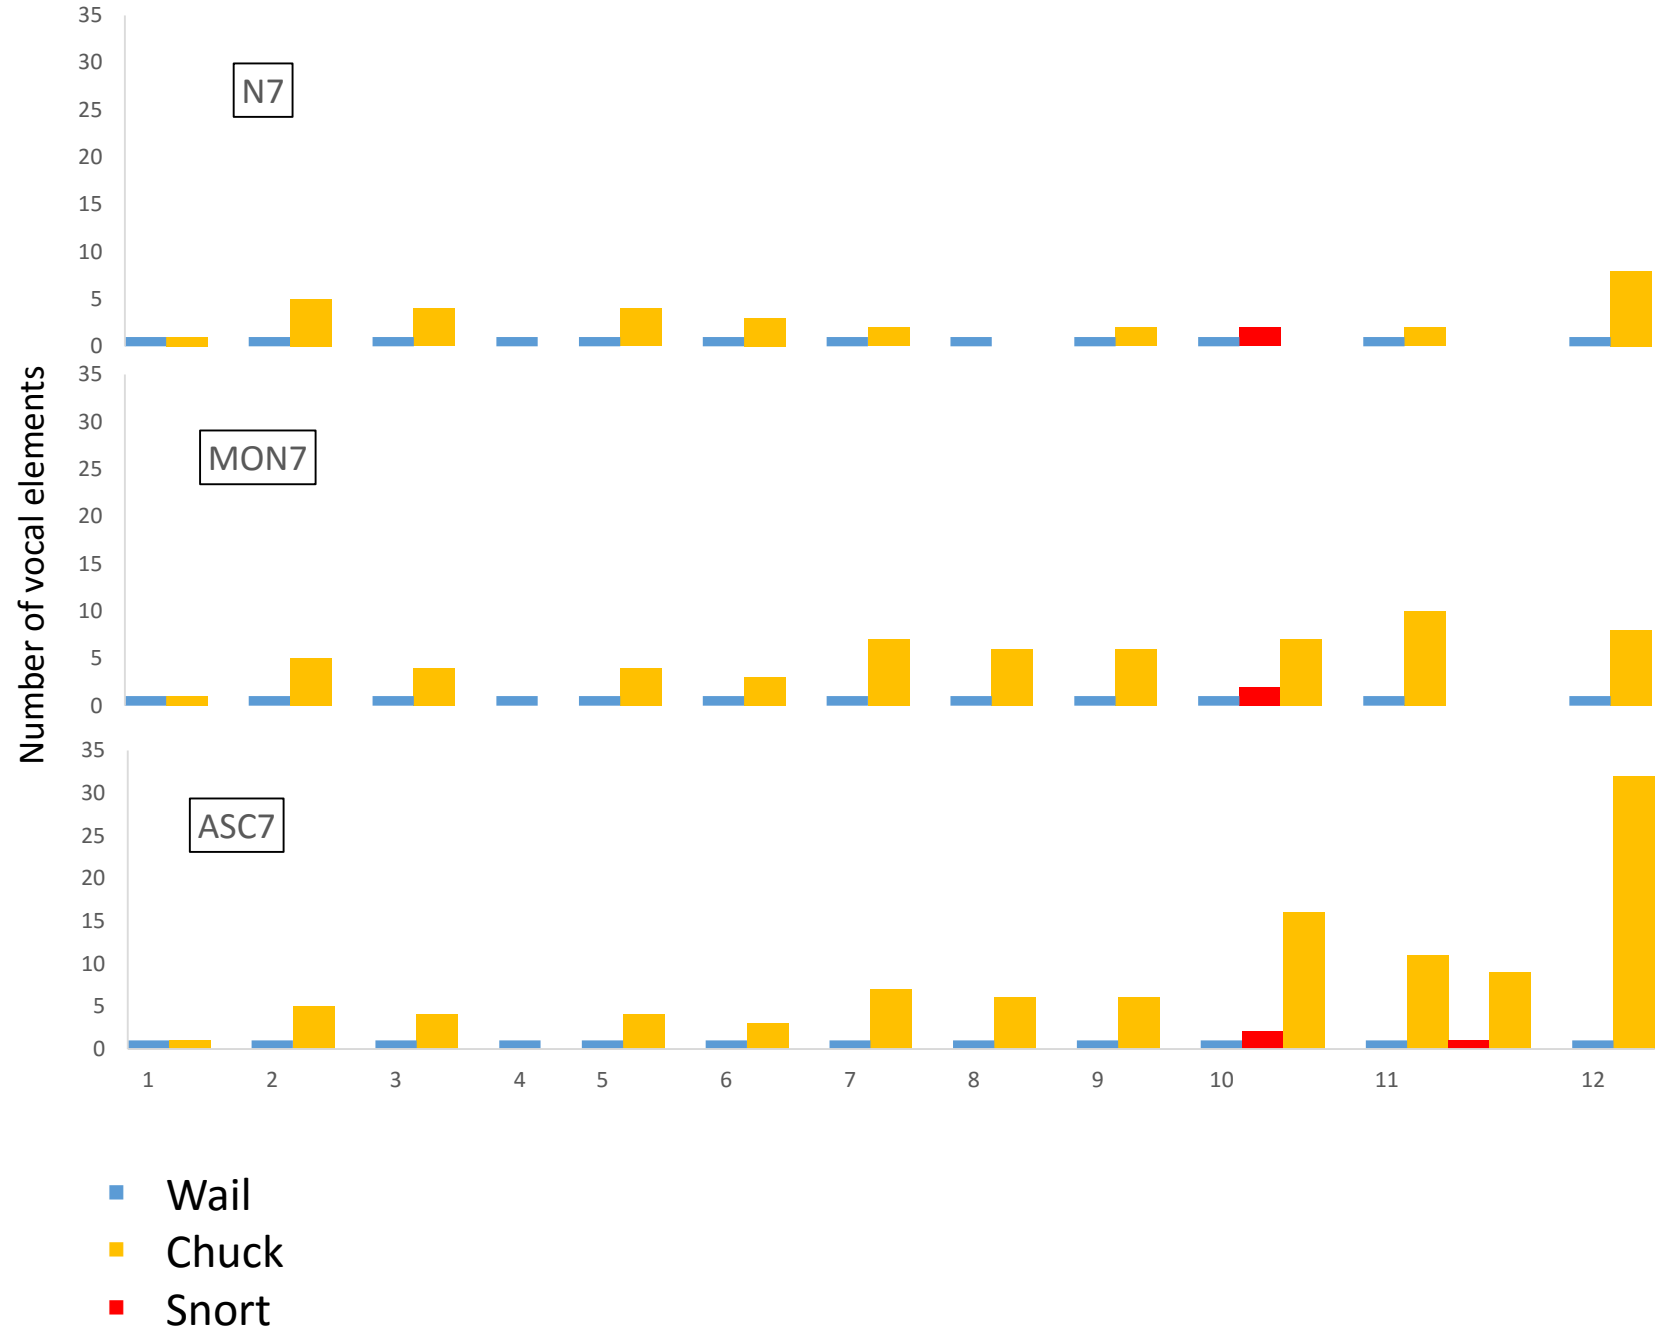

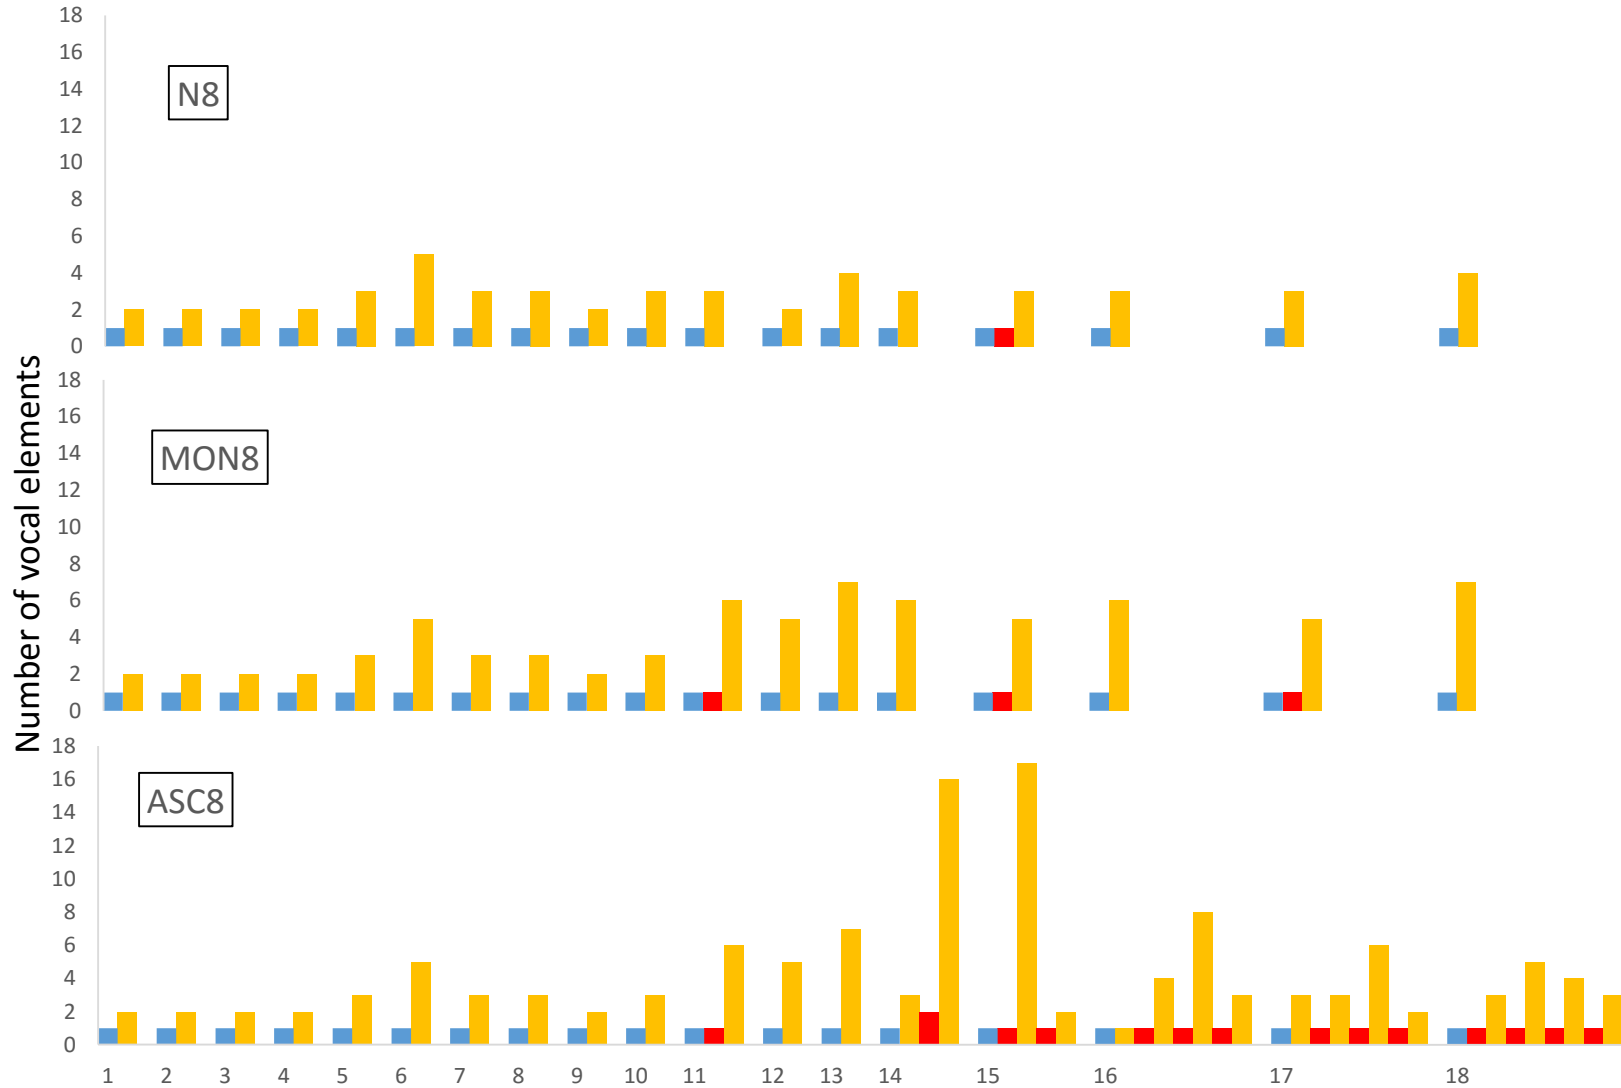

- Wail
- Chuck
- Snort

Fig. S2: Progression plots of vocal element composition over the length of tracks used in playback trials. N= Natural songs with ascending (1-5) or descending (5-8) element progression. MON (1-8) = synthetic songs manipulated to have monotonic element progression. DSC (1-5) = synthetic songs manipulated to have descending element progression. ASC (6-8) = synthetic songs manipulated to have ascending element progression.
